# Supplementary material for: Efficient detection of bilirubin in human serum through a displacement approach
Source: Royal Society of Chemistry journal article supplement (doi:10.1039/d3sd00157a), 2023-01-01
Supplement: d3sd00157a1.pdf [file d3sd00157a1.pdf]

## Supporting information

# An efficient detection of bilirubin in human serum through displacement approach

Nancy Singla, Manzoor Ahmad, Vishal Mahajan, Prabhpreet Singh and Subodh Kumar\*

<sup>a</sup>Department of Chemistry, Centre for Advanced Studies, Guru Nanak Dev University, Amritsar, Punjab, India

|                                                                                                                                                                                                                                                                                                                                         |           |
|-----------------------------------------------------------------------------------------------------------------------------------------------------------------------------------------------------------------------------------------------------------------------------------------------------------------------------------------|-----------|
| Figure S1: <sup>1</sup> H NMR spectrum of NCI-1                                                                                                                                                                                                                                                                                         | Page 2    |
| Figure S2: <sup>1</sup> H NMR spectrum of Th-Y                                                                                                                                                                                                                                                                                          | Page 2    |
| Figure S3: <sup>1</sup> H NMR spectrum of probe <b>THYQ</b>                                                                                                                                                                                                                                                                             | Page 3    |
| Figure S4: <sup>13</sup> C NMR spectrum of probe <b>THYQ</b>                                                                                                                                                                                                                                                                            | Page 3    |
| Figure S5: HRMS of probe <b>THYQ</b>                                                                                                                                                                                                                                                                                                    | Page 4    |
| Figure S6: Emission spectra of <b>THYQ</b> in water- glycerol binary mixtures ( $\lambda_{ex}$ 420 nm); (B) Line plot of fluorescence intensity at 640 nm v/s the fraction of glycerol                                                                                                                                                  | Page 4    |
| Figure S7: (A) Absorbance and (B) Emission spectra of <b>THYQ</b> with the change in pH; (C) The plot of the emission maxima at 500 nm v/s pH                                                                                                                                                                                           | Page 5    |
| Figure S8: The fluorescence spectra of <b>THYQ</b> (10 $\mu$ M, HEPES buffer, pH 7.4) in the presence of 5 equivalents each of HSA, anions, thiols, amines and amino acids                                                                                                                                                              | Page 5    |
| Figure S9: (A) The fluorescence spectra of <b>THYQ-HSA</b> complex; (B) Bar graph representing the FI at 555 nm in presence of 5 equivalents each of cations, anions, thiols, amines and amino acids                                                                                                                                    | Page 5    |
| Figure S10. Change in UV-Vis spectrum of <b>THYQ</b> (10 $\mu$ M, HEPES buffer) on addition of aliquots of HSA                                                                                                                                                                                                                          | Page 6    |
| Figure S11: (A) The distribution of different species of complexes of <b>THYQ</b> with HSA; (B) The change in emission spectrum of HSA at 345 nm on successive addition of aliquots of probe <b>THYQ</b> ( $\lambda_{ex}$ 290 nm); (C) SPECFIT graph showing the distribution of different species of complexes of HSA with <b>THYQ</b> | Page 6    |
| Figure S12: Possibility of FRET mechanism for Bilirubin (BR) detection                                                                                                                                                                                                                                                                  | Page 6    |
| Figure S13: The DLS spectra of <b>THYQ</b> /HSA in the presence of BR                                                                                                                                                                                                                                                                   | Page 7    |
| Figure S14: Effect of other proteins in the quantification of BR                                                                                                                                                                                                                                                                        | Page 7    |
| Table S1: Photophysical properties of <b>THYQ</b> (1 $\mu$ M) in solvents of varied polarity ( $E_T^{30}$ Kcal/mol)                                                                                                                                                                                                                     | Page 7-8  |
| Table S2: Comparison of slopes of $E_T^{30}$ value v/s Emission maxima of <b>THYQ</b> with literature reports                                                                                                                                                                                                                           | Page 8-9  |
| Table S3: Comparison of performance of various fluorescence based systems for the detection of bilirubin                                                                                                                                                                                                                                | Page 9-10 |

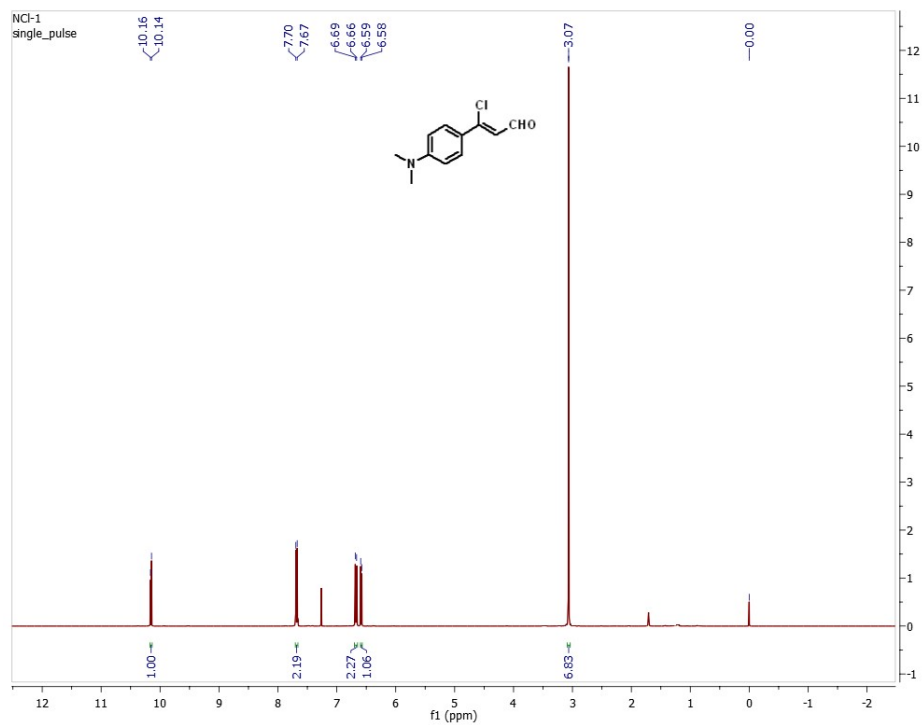

Figure S1:  $^1\text{H}$ NMR spectrum of **NCI-1**

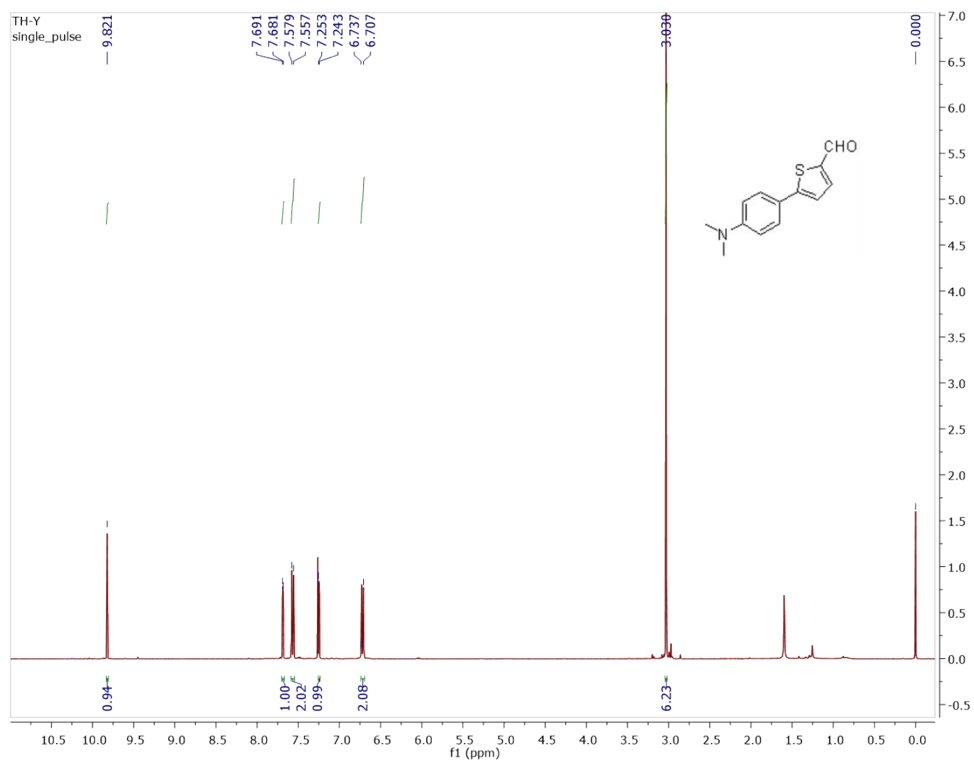

Figure S2:  $^1\text{H}$ NMR spectrum of **TH-Y**

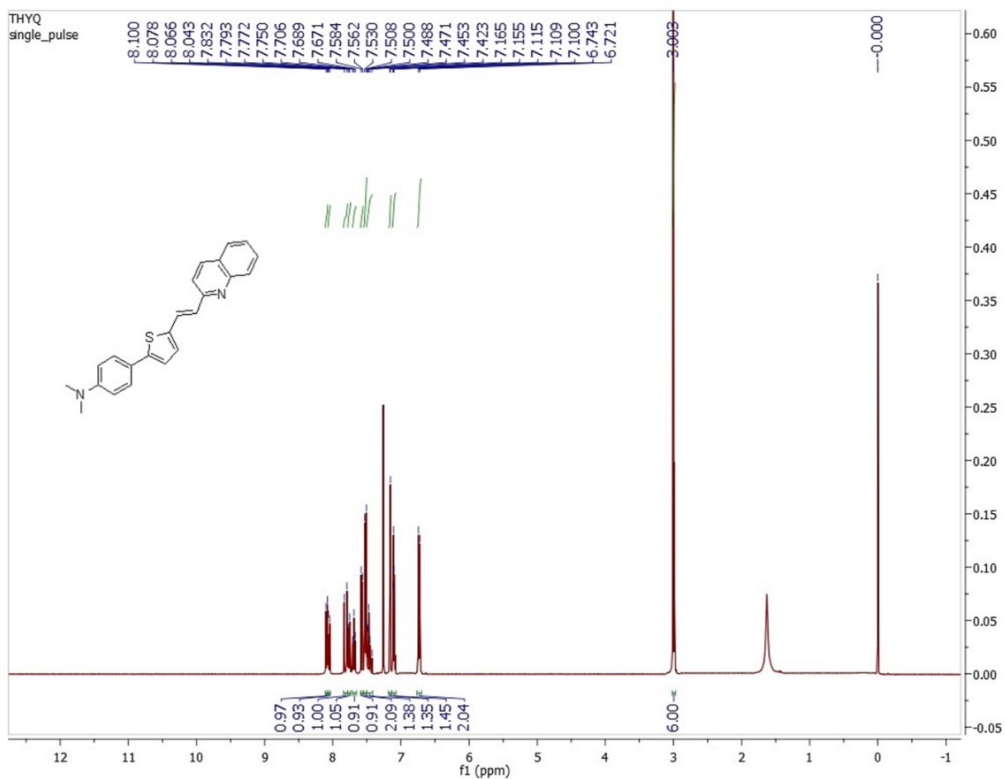

Figure S3:  $^1\text{H}$ NMR spectrum of **THYQ**

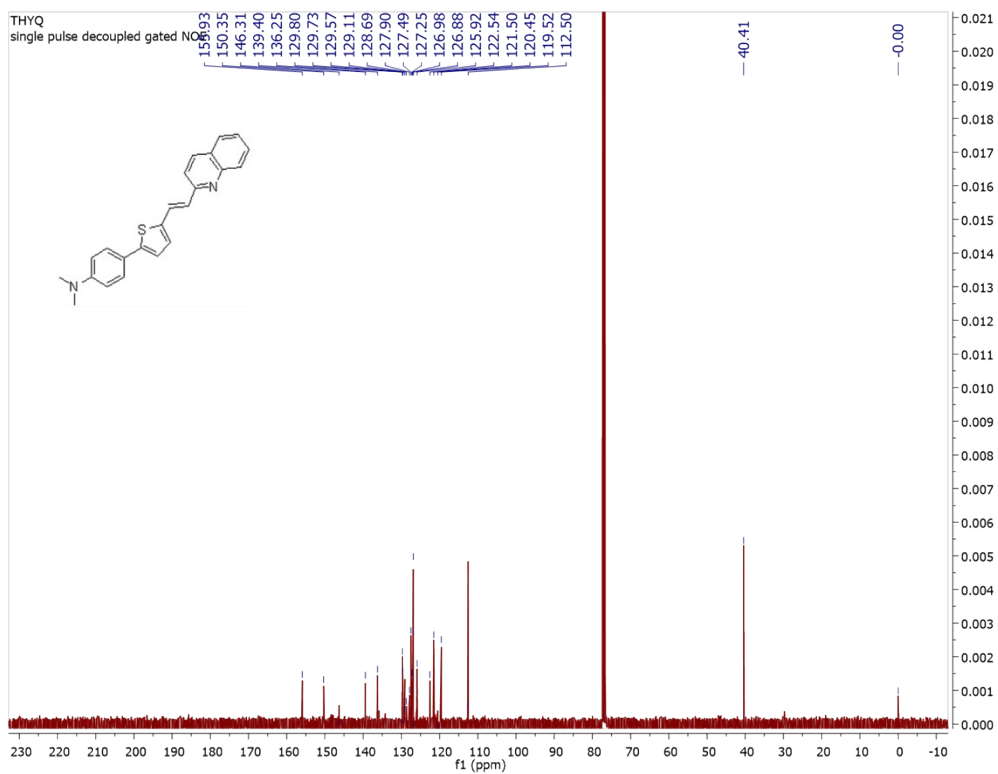

Figure S4:  $^{13}\text{C}$ NMR spectrum of **THYQ**

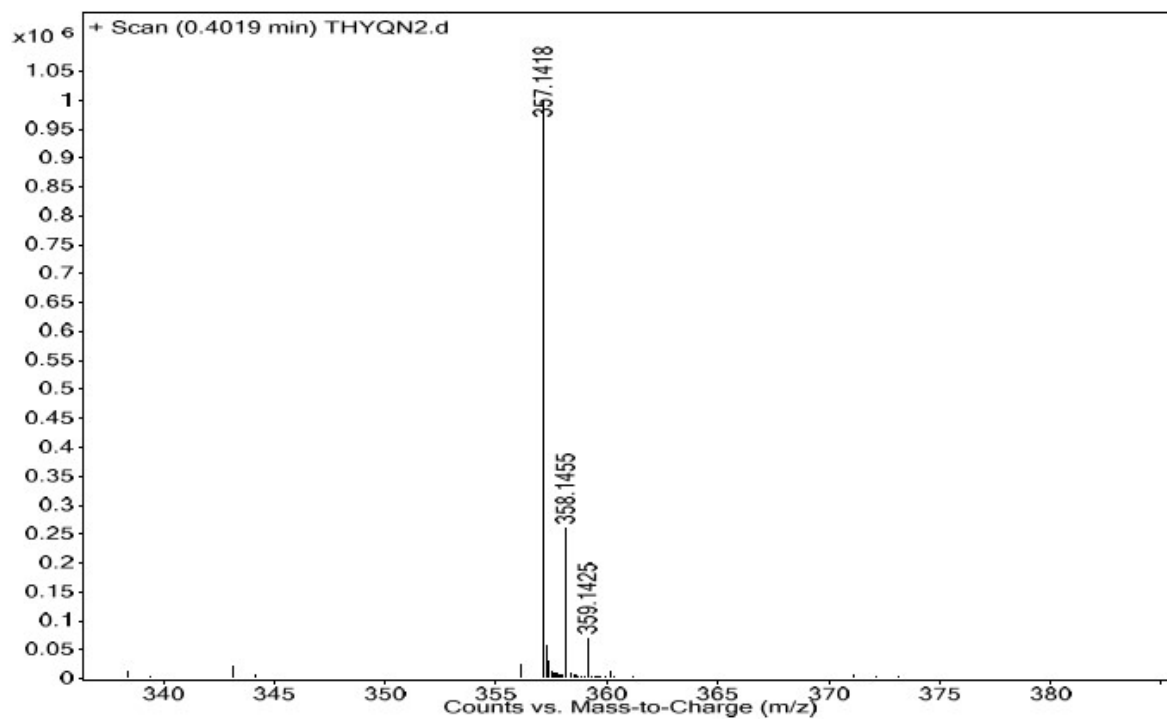

Figure S5: HRMS spectrum of **THYQ**

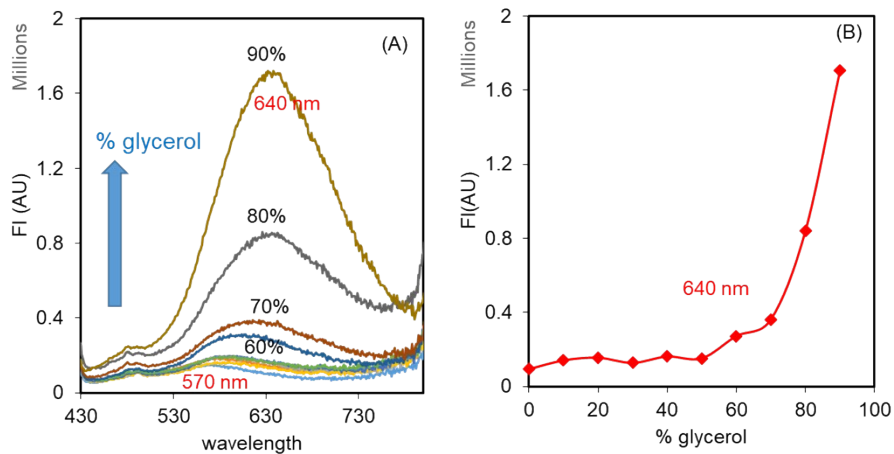

Figure S6: (A) Emission spectra of **THYQ** in water- glycerol binary mixtures ( $\lambda_{ex}$  420 nm); (B) Line plot of fluorescence intensity at 640 nm v/s the fraction of glycerol

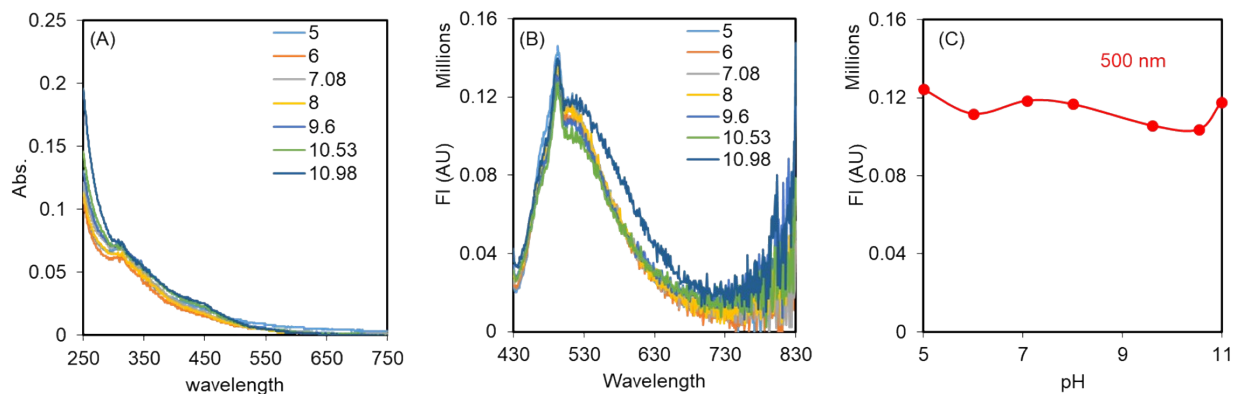

Figure S7: (A) Absorbance and (B) Emission spectra of **THYQ** with the change in pH; (C) The plot of the emission maxima at 500 nm v/s pH

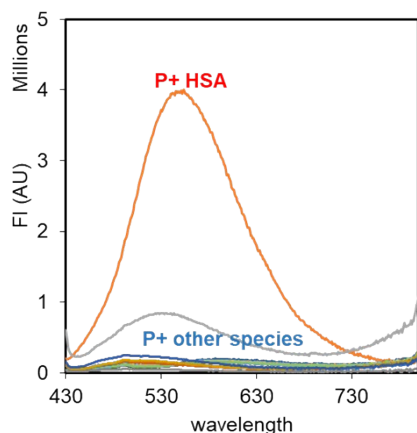

Figure S8: The fluorescence spectra of **THYQ** (10  $\mu$ M, HEPES buffer, pH 7.4) in the presence of 5 equivalents each of HSA, anions, thiols, amines and amino acids

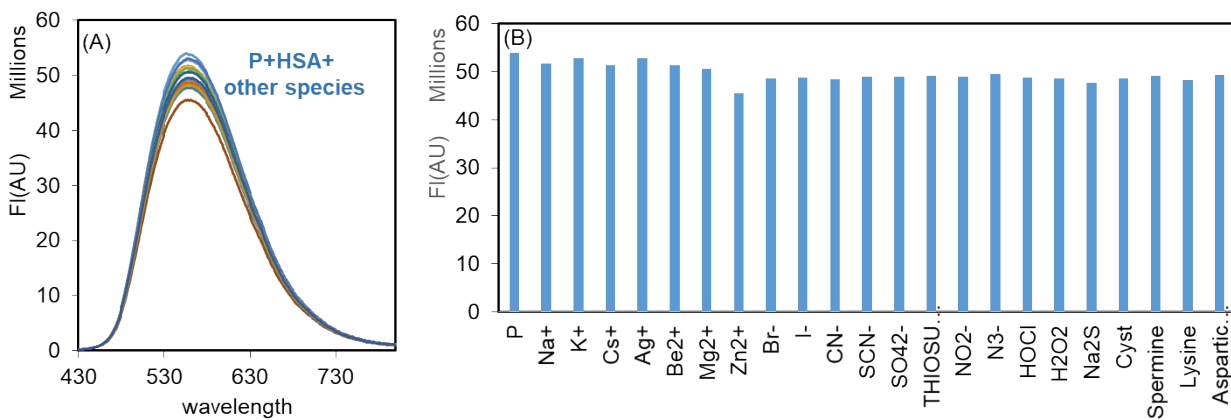

Figure S9: (A) The fluorescence spectra of **THYQ-HSA** complex; (B) Bar graph representing the FI at 555 nm in presence of 5 equivalents each of cations, anions, thiols, amines and amino acids

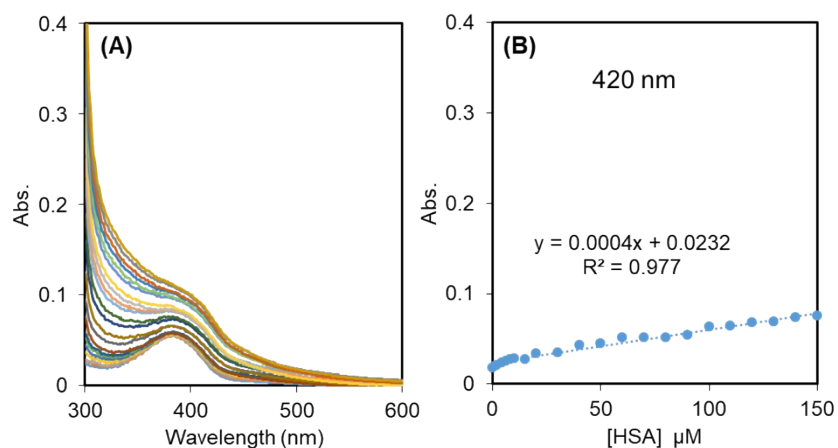

Figure S10: Change in UV-Vis spectrum of THYQ (10  $\mu\text{M}$ , HEPES buffer) on addition of aliquots of HSA

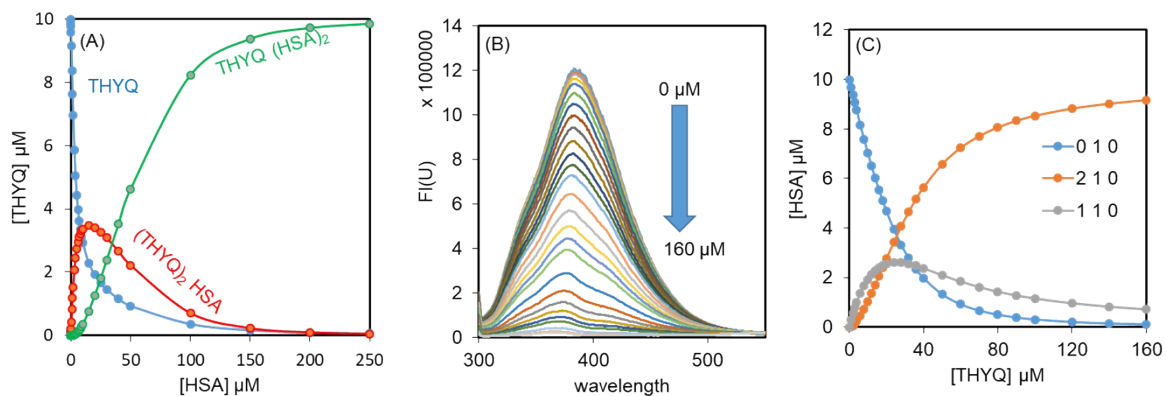

Figure S11: (A) The distribution of different species of complexes of **THYQ** with HSA; (B) The change in emission spectrum of HSA at 345 nm on successive addition of aliquots of probe **THYQ** ( $\lambda_{\text{ex}}$  290 nm); (C) SPECFIT graph showing the distribution of different species of complexes of HSA with THYQ

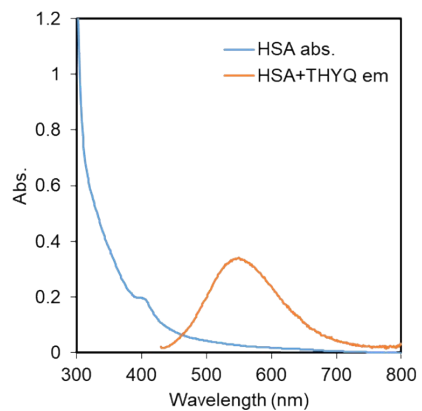

Figure S12: Possibility of FRET mechanism for Bilirubin (BR) detection

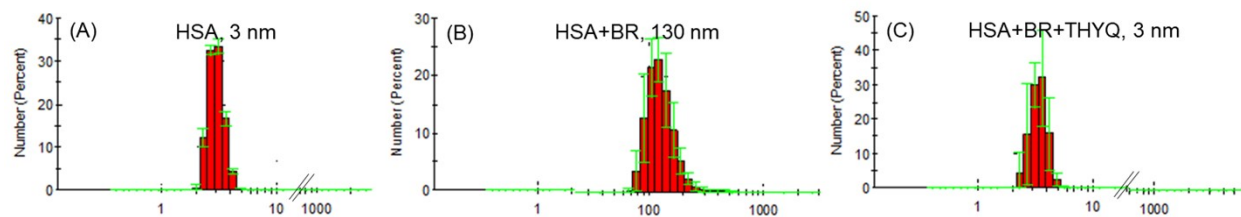

Figure S13: The DLS spectra of THYQ /HSA in the presence of BR

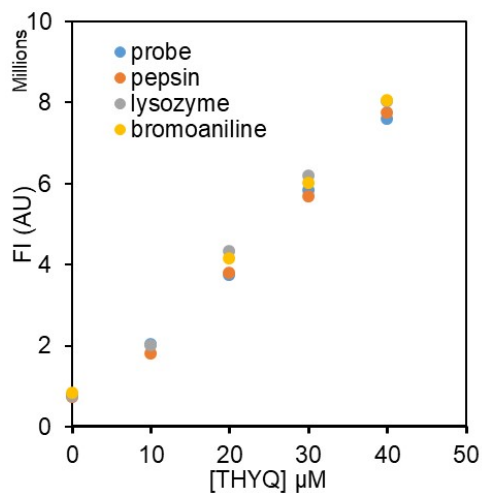

Figure S14: Effect of other proteins in the quantification of BR

Table S1. Photophysical properties of THYQ (1 μM) in solvents of varied polarities ( $E_T^{30}$  Kcal/mol)

| Solvent           | $E_T^{30}$<br>(Kcal/mol) | $\lambda_{Abs.}$<br>Max (nm) | $\lambda_{Em.}$ Max<br>(nm) | $\epsilon$<br>( $M^{-1} cm^{-1}$ ) | $\Phi$<br>(At 1 μM) |
|-------------------|--------------------------|------------------------------|-----------------------------|------------------------------------|---------------------|
| cyclohexane       | 30.9                     | 414                          | 510                         | 11,900                             | 18.38               |
| toulene           | 33.9                     | 427                          | 527                         | 17,100                             | 20.34               |
| Diethyl ether     | 34.5                     | 416                          | 538                         | 21,900                             | 29.61               |
| THF               | 37.4                     | 424                          | 572                         | 25,500                             | 88.12               |
| Ethyl acetate     | 38.1                     | 415                          | 570                         | 24,700                             | 41.76               |
| CHCl <sub>3</sub> | 39.1                     | 424                          | 555                         | 20,200                             | ---                 |
| DCM               | 40.7                     | 422                          | 581                         | 28,100                             | 52.31               |
| acetone           | 42.2                     | 427                          | 594                         | 27,800                             | 84.92               |
| DMF               | 43.2                     | 435                          | 610                         | 29,900                             | 70.87               |
| DMSO              | 45.1                     | 420,546                      | 622                         | 21,400 and 6,000                   | 67.84               |
| ACN               | 45.6                     | 421,536                      | 612                         | 19,400 and 13,600                  | 53.18               |

|          |      |            |           |                   |      |
|----------|------|------------|-----------|-------------------|------|
| ethanol  | 51.9 | 430,537    | 626       | 19,000 and 15,300 | 7.70 |
| methanol | 55.4 | ---        | 636       | ---               | 7.70 |
| Water    | 63.1 | Broad band | weak band | 6100              | -    |

Table S2: Comparison of slopes of  $E_T^{30}$  value v/s Emission maxima of **THYQ** with literature reports

| S. No. | Ref   | Structure | Slope nm / $E_T^{30}$ | S. No. | Ref              | Structure | Slope nm / $E_T^{30}$ |
|--------|-------|-----------|-----------------------|--------|------------------|-----------|-----------------------|
| 1      | Ref 1 |           | 2.7                   | 7      | Ref 6            |           | 5.7                   |
| 2      | Ref 1 |           | 4.6                   | 8      | Ref 7            |           | 7.7                   |
| 3      | Ref 2 |           | 3.98                  | 9      | Ref 8            |           | 10.03                 |
| 4      | Ref 3 |           | 4.51                  | 10     | Ref 9            |           | 6.14                  |
| 5      | Ref 4 |           | 9.32                  | 11     | <b>This Work</b> |           | 7.88                  |
| 6      | Ref 5 |           | 9.46                  |        |                  |           |                       |

## References

1. C. Yu, X. Guo, X. Fang, N. Chen, Q. Wu, E. Hao and L. Jiao, *Dyes Pigm.*, 2022, **197**, 109838.
2. M. Collot, S. Bou, T.K. Fam, L. Richert, Y. Mély, L. Danglot and A.S. Klymchenko, *Anal. Chem.*, 2019, **91**, 1928–1935.
3. C.W. Song, U. Tamima, Y.J. Reo, M. Dai, S. Sarkar and K.H. Ahn, *Dyes Pigm.*, 2019, **171**, 107718.
4. H. Wang, L. Hu, S. Shen, K. Yu and Y. Wang, *New J. Chem.*, 2021, **45**, 21553–21556.
5. J. Yin, M. Peng, Y. Ma, R. Guo and W. Lin, *Chem. Commun.*, 2018, **54**, 12093–12096.
6. L. Yang, J. Wang, B. Liu, G. Han, H. Wang, L. Yang, J. Zhao, M.-Y. Han and Z. Zhang, *Sens. Actuators B.*, 2021, **333**, 129541.



7. Z. Zhan, W. Zhuang, Q. Lei, S. Li, W. Mao, M. Chen and W. Li, *Chem. Commun.*, 2022, **58**, 4020–4023.
8. X. Zhang, L. Yuan, J. Jiang, J. Hu, A. du Rietz, H. Cao, R. Zhang, X. Tian, F. Zhang, Y. Ma, Z. Zhang, K. Uvdal and Z. Hu, *Anal. Chem.*, 2020, **92**, 3613-3619.
9. X. Shi, S.H. P. Sung, M.M. S. Lee, R.T. K. Kwok, H.H. Y. Sung, H. Liu, J.W. Y. Lam, I. D. Williams, B. Liu and B. Zhong Tang, *J. Mater. Chem. B.*, 2020, **8**, 1516–1523.

Table S3: Comparison of performance of various fluorescence based systems for the detection of bilirubin

| Sr. No                               | Fluorescence System                                      | pH   | FL ON/OFF | Linear range                | LOD                 | Clinical detection Spiking /direct | [Ref], Year |
|--------------------------------------|----------------------------------------------------------|------|-----------|-----------------------------|---------------------|------------------------------------|-------------|
| <b>Organic molecule based probes</b> |                                                          |      |           |                             |                     |                                    |             |
| 1.                                   | Displacement approach                                    | 7.4  | “ON”      | 2-80 $\mu\text{M}$          | 68 nM               | direct                             | This Work   |
| 2.                                   | Imine based                                              | 7.4  | “OFF”     | 1 pM-500 $\mu\text{M}$      | 2.8 pM              | spiking                            | 1, 2017     |
| 3.                                   | Probe+Fe <sup>3+</sup> mixture used                      | 7.2  | “ON”      | 0–10 $\mu\text{M}$          | 76 nM               | direct                             | 2, 2020     |
| 4.                                   | Probe+Fe <sup>3+</sup> mixture used                      | 7.4  | “ON”      | 0–10 $\mu\text{M}$          | 33 nM               | direct                             | 3, 2021     |
| 5.                                   | Amphiphilic molecule                                     | 6.5  | “OFF”     | 0–32 $\mu\text{M}$          | 330 nM              | spiking                            | 4, 2023     |
| 6.                                   | imidazole derivative                                     | 7.4  | “OFF”     | 0–60 $\mu\text{M}$          | 11.74 $\mu\text{M}$ | spiking                            | 5, 2023     |
| <b>Nano-materials</b>                |                                                          |      |           |                             |                     |                                    |             |
| 7.                                   | HSA stabilized gold nanoclusters                         | 7.4  | “OFF”     | 1–50 $\mu\text{M}$          | 248 nM              | spiking                            | 6, 2014     |
| 8.                                   | Peroxidase method                                        | 8.0  | “OFF”     | 0.03-5.0 $\mu\text{M}$      | 10 nM               | spiking                            | 7, 2018     |
| 9.                                   | S,N-doped carbon dots + Fe <sup>3+</sup>                 | 2.5  | “ON”      | 0.2 -2.0 nM                 | 0.12 nM             | spiking                            | 8, 2018     |
| 10.                                  | BSA stabilized copper nanocluster + Fe <sup>3+</sup>     | 11.4 | “ON”      | 0-70 $\mu\text{M}$          | 6.62 nM             | spiking                            | 9, 2018     |
| 11.                                  | L-cysteine capped Mn doped ZnS <sub>2</sub> quantum dots | 4.7  | “OFF”     | 10.99 - 63.84 $\mu\text{M}$ | 1800 nM             | spiking                            | 10, 2019    |
| 12.                                  | N doped carbon dots                                      | 7.4  | “OFF”     | 0-45 $\mu\text{M}$          | 89 nM               | spiking                            | 11, 2021    |
| 13.                                  | glutathione capped copper nanoclusters                   | ND   | “OFF”     | 9-800 $\mu\text{M}$         | 148 nM              | *ND                                | [12], 2021  |
| 14.                                  | TPE hydrogel                                             | 7.4  | “OFF”     | 0-8 $\mu\text{M}$           | 25 nM               | *ND                                | [13], 2022  |
| 15.                                  | competitive binding of Cu <sup>2+</sup>                  | 5.0  | “ON”      | 0.7–3.6 $\mu\text{M}$       | 85 nM               | spiking                            | [14], 2022  |

\*ND = not determined

## References

1. S. Ellairaja, K. Shenbagavalli, S. Ponmariappan and V.S. Vasantha, *Biosens. Bioelectron.*, 2017, **91**, 82–88.

2. E. Ahmmed, A. Mondal, A. Sarkar, S. Chakraborty, S. Lohar, N.C. Saha, K. Dhara and P. Chattopadhyay, *ACS Appl. Bio Mater.*, 2020, **3**, 4074-4080.
3. E. Ahmmed, A. Mondal, N.C. Saha, K. Dhara and P. Chattopadhyay, *Anal. Methods*, 2021, **13**, 5651–5659.
4. S. Qi, X. He, S. Zhang, P. Xu, M. Su, B. Dong and B. Song, *Anal. Chim. Acta*, 2023, **1238**, 340657.
5. K. Anusuyadevi and S. Velmathi, *Anal. Chim. Acta*, 2023, **1239**, 340678.
6. M. Santhosh, S. R. Chinnadayala, A. Kakoti and P. Goswami, *Biosens. Bioelectron.*, 2014, **59**, 370–376.
7. M. Zhang, L. Xu, Q. Ma, H. Yu, H. Fang, Z. Lin, Q. Zhang and Z. Chen, *ACS Appl. Mater. Interfaces*, 2018, **10**, 42155–42164.
8. R.R. Anjana, J.S. Anjali Devi, M. Jayasree, R.S. Aparna, B. Aswathy, G.L. Praveen, G.M. Lekha and G. Sony, *Microchim. Acta*, 2018, **185**, 1-11.
9. M. Jayasree, R.S. Aparna, R.R. Anjana, J.S. Anjali Devi, Nebu John, K. Abha, A. Manikandan and S. George, *Anal. Chim. Acta*, 2018, **1031**, 152-160.
10. K. Abha, J. Nebu, J.S. Anjali Devi, R.S. Aparna, R.R. Anjana, A.O. Aswathy and S. George, *Sens. Actuators B.*, 2019, **282**, 300–308.
11. N. Nandi, S. Gaurav, P. Sarkar, S. Kumar and K. Sahu, *ACS Appl. Bio Mater.*, 2021, **4**, 5201–5211.
12. S. K. Anand, M. R. Mathew and K. G. Kumar, *J Photochem Photobiol, A.*, 2021, **418**, 113379.
13. B. Wang, X. Q. Zhou, L. Li, Y. X. Li, L. P. Yu and Y. Chen, *Sens. Actuators B.*, 2022, **369**, 132392.
14. B. Barik and S. Mohapatra, *Anal. Biochem.*, 2022, **654**, 114813.
